# Supplementary material
Source: bioRxiv or medRxiv preprint supplement (https://www.biorxiv.org/highwire/filestream/78120/field_highwire_adjunct_files/0/254623-1.pdf)
Supplement: Supplementary file [file 254623-1.pdf]

## Supporting Information

A role for a conserved kinase in the transcriptional control of methionine biosynthesis in *Escherichia coli* experiencing sustained nitrogen starvation

Amy Switzer<sup>1</sup>, Dimitrios Evangelopoulos<sup>2</sup>, Rita Figueira<sup>1</sup>, Luiz Pedro S. de Carvalho<sup>2</sup>, Daniel R. Brown<sup>1\*</sup>, and Sivaramesh Wigneshweraraj<sup>1\*</sup>

<sup>1</sup>MRC Centre for Molecular Bacteriology and Infection, Imperial College London, London, SW7 2AZ, UK; <sup>2</sup>Mycobacterial Metabolism and Antibiotic Research Laboratory, The Francis Crick Institute, 1 Midland Road, London, NW1 1AT, UK.

\*To whom correspondence should be addressed: Daniel Brown ([d.brown06@imperial.ac.uk](mailto:d.brown06@imperial.ac.uk)) or Sivaramesh Wigneshweraraj ([s.r.wig@imperial.ac.uk](mailto:s.r.wig@imperial.ac.uk))

### Materials included:

**Figure S1.** Heat maps of the  $\sigma^{38}$  regulon.

**Figure S2.** Heat maps of dysregulated genes at N- (motility-associated).

**Figure S3.** qRT-PCR complementation data for RNA seq N-24 dysregulated genes.

**Movie S1.** Phase contrast video of wild-type bacteria at N- (see attached .avi file).

**Movie S2.** Phase contrast video of wild-type bacteria at N-24 (see attached .avi file).

**Table S1.** List of strains and plasmids used in this study.

**Table S2.** List of primers used in this study.

**Table S3.** Differentially expressed genes in  $\Delta yeaG$  bacteria at N- relative to wild-type bacteria.

**Table S4.** Differentially expressed genes in  $\Delta yeaG$  bacteria at N-24 relative to wild-type bacteria.

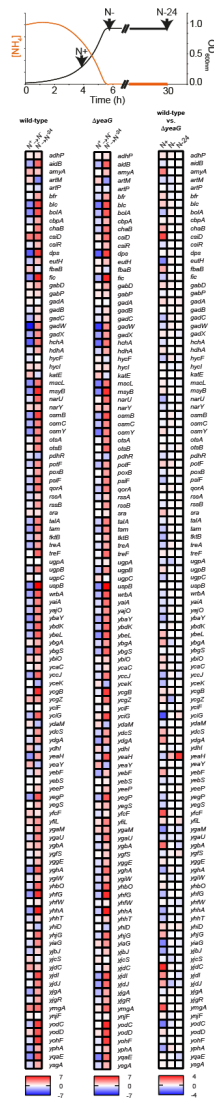

**Figure S1**

**Figure S1.** Heat map showing expression levels of the  $\sigma^{38}$  regulon (as described in (8)) in wild-type (*left*) and  $\Delta yeaG$  (*right*) bacteria at N- relative to N+, and at N-24 relative to N-, and in  $\Delta yeaG$  relative to wild-type bacteria at N+, N-, and N-24 (*right*). The colour keys at the bottom indicate the range in fold-change in relative gene expression for each comparison. The schematic representation of the bacterial growth curve at the top indicates the time points: N+, N- and N-24 with respect to the N consumption ( $[\text{NH}_4]$ ) and growth ( $\text{OD}_{600\text{nm}}$ ).

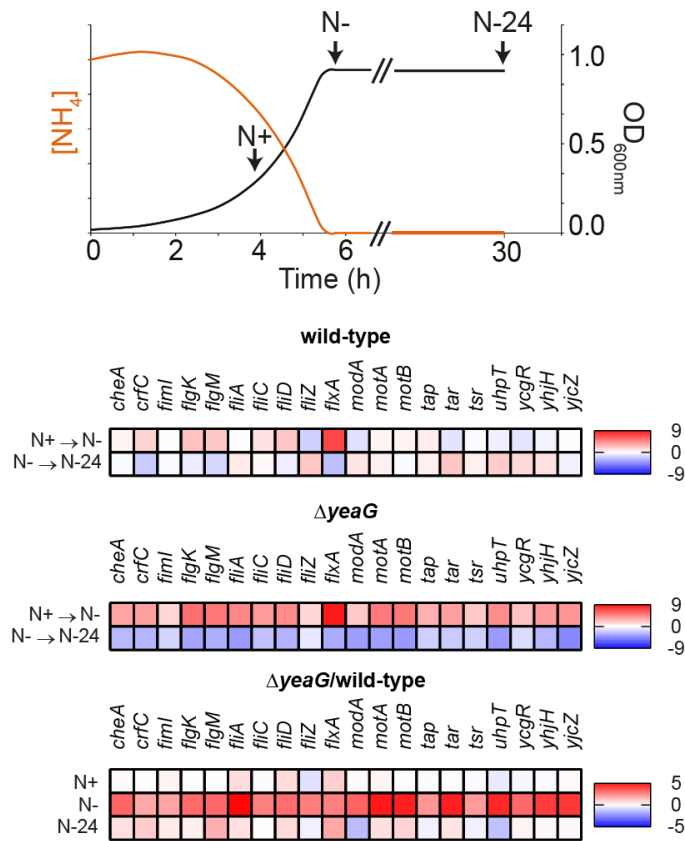

**Figure S2**

**Figure S2.** Heat map showing expression levels of motility associated genes in wild-type (*top*) and  $\Delta yeaG$  (*middle*) bacteria at N- relative to N+, and N-24 relative to N-, and in  $\Delta yeaG$  relative to wild-type bacteria at N+, N-, and N-24 (*bottom*). The colour keys on the right indicate the range in fold-change in relative gene expression for each comparison. The schematic representation of the bacterial growth curve at the top indicates the time points: N+, N- and N-24 with respect to the N consumption ( $[NH_4]$ ) and growth ( $OD_{600nm}$ ).

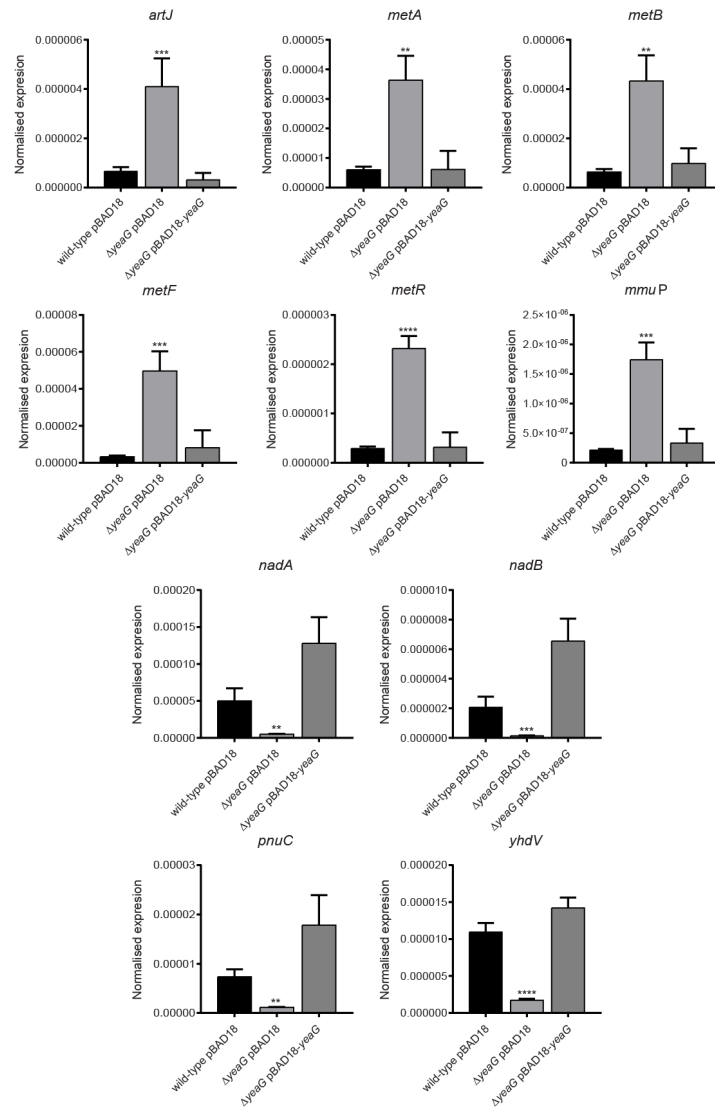

**Figure S3**

**Figure S3.** qRT-PCR results showing relative abundance of transcripts (normalised to 16S control expression) of *artJ*, *metA*, *metB*, *metF*, *metR*, *mmuP*, *nadA*, *nadB*, *pneC*, and *yhdV* at N-24 in wild-type (black bars),  $\Delta$ *yeaG* bacteria (light grey bars), and  $\Delta$ *yeaG* bacteria in which *yeaG* was complemented from an inducible plasmid (dark grey bars; in the presence of the inducer). See text for details. Error bars represent s.e.m. (n=3). Statistical analyses were performed by one-way ANOVA (\*\*  $p < 0.01$ , \*\*\*  $p < 0.001$ ).

## SUPPLEMENTARY MOVIES

**Movie S1.** Phase contrast video of wild-type bacteria at N-.

**Movie S2.** Phase contrast video of wild-type bacteria at N-24.

**Table S1. List of strains and plasmids used in this study**

| Strains                  |                                                                                                                                                                                                                                                |                                     |
|--------------------------|------------------------------------------------------------------------------------------------------------------------------------------------------------------------------------------------------------------------------------------------|-------------------------------------|
| Name                     | Description                                                                                                                                                                                                                                    | Source or Reference                 |
| Wild-type (BW25113)      | <i>E. coli</i> K-12 ( <i>araD-araB</i> )567Δ( <i>rhaD-rhaB</i> )568Δ <i>lacZ</i> 4787 ( <i>::rrnB-3</i> ) <i>hsdR514 rph-1</i>                                                                                                                 | <i>E. coli</i> Genetic Stock Center |
| Δ <i>yeaG</i> (JW1772)   | BW25113 Δ <i>yeaG</i> 780:: <i>kan</i>                                                                                                                                                                                                         | <i>E. coli</i> Genetic Stock Center |
| Δ <i>metJ</i>            | BW25113 Δ <i>metJ</i> :: <i>kan</i>                                                                                                                                                                                                            | This study                          |
| <i>metJ</i> -FLAG        | BW25113 <i>metJ</i> -3xFLAG                                                                                                                                                                                                                    | This study                          |
| Δ <i>yeaG metJ</i> -FLAG | JW1772-1 <i>metJ</i> -3xFLAG                                                                                                                                                                                                                   | This study                          |
| MC1061                   | <i>E. coli</i> K-12 F <sup>-</sup> λ <sup>-</sup> Δ( <i>ara-leu</i> )7697 [ <i>araD139</i> ]B/r Δ( <i>codB-lacI</i> )3 <i>galK16 galE15 e14<sup>-</sup> mcrA0 relA1 rpsL150(Str<sup>R</sup>) spoT1 mcrB1 hsdR2(r<sup>-</sup>m<sup>+</sup>)</i> | Stratagene®                         |
| Plasmids                 |                                                                                                                                                                                                                                                |                                     |
| Name                     | Description                                                                                                                                                                                                                                    | Source or reference                 |
| pBAD18- <i>yeaG</i>      | pBAD18 expressing 6xHis- <i>yeaG</i> under an arabinose-inducible promoter ( <i>araC</i> ) (AmpR )                                                                                                                                             | (1)                                 |
| pDOC-F                   | pEX100T 3XFLAG:: <i>km</i>                                                                                                                                                                                                                     | (2)                                 |

**Table S2. List of primers used in this study****Primers for qRT-PCR**

| Name            | 5' to 3' nucleotide sequence |
|-----------------|------------------------------|
| 16S fwd         | TGCATCTGATACTGGCAAGC         |
| 16S rvs         | ACCTGAGCGTCAGTCTTCGT         |
| <i>artJ</i> fwd | CACCCGGAAGTGAAAAGTGT         |
| <i>artJ</i> rvs | GGCTTTGTTATCCGGACGTA         |
| <i>metA</i> fwd | GGCCTGGTGGAGTTTAATGA         |
| <i>metA</i> rvs | GCGAGTTTGCTTAGGAATGC         |
| <i>metB</i> fwd | GAGCGTGGTGGATAACACCT         |
| <i>metB</i> rvs | GTCCGGGTCTTTAGCAATCA         |
| <i>metF</i> fwd | AACTGGTTGGCGCGAATA           |
| <i>metF</i> rvs | CCCAGCGTATGGCAAATC           |
| <i>metR</i> fwd | ATTATTCGCCGATGTTTCGAC        |
| <i>metR</i> rvs | CTACGCTGCACCGGATAAAT         |
| <i>mmuP</i> fwd | CTGGTGGTCTGGCTGGTTAT         |
| <i>mmuP</i> rvs | GGTCCAGGTCAGCCAGTAAA         |
| <i>nadA</i> fwd | AACCGGTGGCTGTATTTCTG         |
| <i>nadA</i> rvs | TTCCGGACTGAGAATTTTGG         |
| <i>nadB</i> fwd | CCATTGGCGAGGTGAGTTAT         |
| <i>nadB</i> rvs | CTCGTGCCAGTTATGCTGAA         |
| <i>pnuC</i> fwd | CGACAAACCAGTCAGAACGA         |
| <i>pnuC</i> rvs | TGCAAACACCGGATTGATAA         |
| <i>yhdV</i> fwd | ATCAGGGTTCGTCTGGTTCAC        |
| <i>yhdV</i> rvs | ATAGAGCGATGATCCCCATC         |

**Primers used for rate limiting semi-quantitative PCR of the *metF* promoter**

| Name               | 5' to 3' nucleotide sequence |
|--------------------|------------------------------|
| <i>metF</i> _p_fwd | CCCTTCGGCTTTTCCTTCAT         |
| <i>metF</i> _p_rvs | AAGCTCATACCTTACCTCATCAA      |

**Table S3. Differentially expressed genes in  $\Delta yeaG$  bacteria at N- relative to wild-type bacteria.**

| <b>Gene</b> | <b>Log<sub>2</sub> Fold Change</b> | <b>Adjusted <i>p</i> value</b> |
|-------------|------------------------------------|--------------------------------|
| <i>fliA</i> | 4.85                               | 5.54E-18                       |
| <i>motA</i> | 4.50                               | 1.39E-14                       |
| <i>motB</i> | 4.37                               | 8.22E-15                       |
| <i>tar</i>  | 4.35                               | 4.04E-09                       |
| <i>uhpT</i> | 4.23                               | 1.16E-15                       |
| <i>yjcZ</i> | 3.89                               | 3.73E-14                       |
| <i>yhjH</i> | 3.81                               | 6.97E-06                       |
| <i>modA</i> | 3.02                               | 4.04E-09                       |
| <i>cheA</i> | 2.96                               | 5.84E-08                       |
| <i>flgM</i> | 2.95                               | 3.98E-06                       |
| <i>ycgR</i> | 2.93                               | 2.11E-05                       |
| <i>flgK</i> | 2.91                               | 1.83E-05                       |
| <i>fliD</i> | 2.86                               | 4.25E-06                       |
| <i>fliZ</i> | 2.52                               | 0.000394429                    |
| <i>fliC</i> | 2.49                               | 9.20E-06                       |
| <i>flxA</i> | 2.49                               | 0.000148505                    |
| <i>tap</i>  | 2.07                               | 0.00500253                     |
| <i>tsr</i>  | 1.95                               | 0.005997069                    |
| <i>fimI</i> | 1.76                               | 0.014091924                    |
| <i>crfC</i> | 1.74                               | 0.0418916                      |

**Table S4. Differentially expressed genes in  $\Delta$ yeaG bacteria at N-24 relative to wild-type bacteria.**

| <b>Gene</b> | <b>Log<sub>2</sub> Fold Change</b> | <b>Adjusted p value</b> | <b>Gene</b> | <b>Log<sub>2</sub> Fold Change</b> | <b>Adjusted p value</b> |
|-------------|------------------------------------|-------------------------|-------------|------------------------------------|-------------------------|
| <i>metF</i> | 6.35                               | 2.03E-13                | <i>zapC</i> | 2.29                               | 0.007721396             |
| <i>metA</i> | 5.71                               | 8.91E-14                | <i>marR</i> | 2.28                               | 0.018989235             |
| <i>metB</i> | 5.29                               | 5.16E-12                | <i>argH</i> | 2.25                               | 0.003321725             |
| <i>metR</i> | 4.44                               | 3.78E-07                | <i>ygbA</i> | 2.25                               | 0.000904865             |
| <i>metL</i> | 4.19                               | 0.000441159             | <i>psd</i>  | 2.24                               | 0.024679973             |
| <i>ysaB</i> | 3.79                               | 0.001518954             | <i>yqhC</i> | 2.22                               | 0.002368144             |
| <i>mmuP</i> | 3.72                               | 4.21E-08                | <i>trxC</i> | 2.20                               | 0.029712355             |
| <i>artJ</i> | 3.47                               | 1.55E-07                | <i>argF</i> | 2.20                               | 0.034888857             |
| <i>yjdC</i> | 3.29                               | 0.00049423              | <i>ybdH</i> | 2.19                               | 0.000101966             |
| <i>ydeS</i> | 3.22                               | 0.031444707             | <i>nemR</i> | 2.17                               | 2.16E-05                |
| <i>metK</i> | 3.08                               | 0.002368144             | <i>dacB</i> | 2.17                               | 0.027517357             |
| <i>ybdL</i> | 3.07                               | 1.00E-07                | <i>gspE</i> | 2.15                               | 0.015349722             |
| <i>mmuM</i> | 3.06                               | 0.000760383             | <i>ydjM</i> | 2.12                               | 0.005251082             |
| <i>metJ</i> | 2.98                               | 0.017914666             | <i>dacC</i> | 2.08                               | 0.036443447             |
| <i>yfhL</i> | 2.97                               | 0.031465369             | <i>cusB</i> | 2.06                               | 0.034742366             |
| <i>recN</i> | 2.97                               | 1.42E-05                | <i>gspC</i> | 2.06                               | 0.015215919             |
| <i>yiiX</i> | 2.93                               | 0.000101966             | <i>mlrA</i> | 2.02                               | 0.044274961             |
| <i>mazE</i> | 2.91                               | 2.32E-05                | <i>bdcA</i> | 1.99                               | 0.004574303             |
| <i>hyi</i>  | 2.82                               | 0.016182985             | <i>nemA</i> | 1.99                               | 0.034888857             |
| <i>lexA</i> | 2.75                               | 0.002368144             | <i>hemH</i> | 1.99                               | 0.000904865             |
| <i>ydbL</i> | 2.74                               | 0.00436513              | <i>amyA</i> | 1.98                               | 0.033724337             |
| <i>yihM</i> | 2.72                               | 0.044274961             | <i>argB</i> | 1.97                               | 0.005184111             |
| <i>gspD</i> | 2.70                               | 3.02E-05                | <i>glnK</i> | 1.97                               | 0.028108774             |
| <i>hiuH</i> | 2.69                               | 5.10E-07                | <i>mazF</i> | 1.96                               | 0.000566992             |
| <i>argC</i> | 2.68                               | 6.21E-06                | <i>metC</i> | 1.96                               | 0.006524094             |
| <i>yghS</i> | 2.67                               | 0.044274961             | <i>recA</i> | 1.95                               | 0.010041104             |
| <i>yjjJ</i> | 2.67                               | 0.000251888             | <i>ybjI</i> | 1.94                               | 0.033650828             |
| <i>era</i>  | 2.66                               | 0.005018997             | <i>glnH</i> | 1.93                               | 0.035054287             |
| <i>ymgA</i> | 2.62                               | 0.037371218             | <i>carB</i> | 1.92                               | 0.044274961             |
| <i>yfcF</i> | 2.62                               | 0.001201977             | <i>yfcD</i> | 1.91                               | 0.004854514             |
| <i>casB</i> | 2.60                               | 0.005251082             | <i>opgB</i> | 1.90                               | 0.044274961             |
| <i>carA</i> | 2.58                               | 0.001210561             | <i>dinB</i> | 1.86                               | 0.004319575             |
| <i>fliY</i> | 2.57                               | 0.036443447             | <i>hmp</i>  | 1.83                               | 0.000316995             |
| <i>argA</i> | 2.55                               | 0.006524094             | <i>ypjA</i> | 1.83                               | 0.002475129             |
| <i>yhbS</i> | 2.51                               | 0.000856934             | <i>yjfD</i> | 1.81                               | 0.033164239             |
| <i>argG</i> | 2.50                               | 0.000221252             | <i>ddpX</i> | 1.80                               | 0.004574303             |
| <i>pspA</i> | 2.43                               | 0.001541847             | <i>queA</i> | 1.79                               | 0.049247204             |
| <i>ycfP</i> | 2.42                               | 0.038564968             | <i>casC</i> | 1.76                               | 0.044917048             |
| <i>yccT</i> | 2.41                               | 2.66E-06                | <i>rmuC</i> | 1.75                               | 0.002866567             |
| <i>gloA</i> | 2.40                               | 0.000904865             | <i>guaD</i> | 1.73                               | 0.008884935             |
| <i>metN</i> | 2.37                               | 0.005388586             | <i>ibpA</i> | 1.71                               | 0.002910635             |
| <i>hyaB</i> | 2.34                               | 0.017625157             | <i>lolC</i> | 1.70                               | 0.008955575             |



| Gene        | Log <sub>2</sub> Fold Change | Adjusted <i>p</i> value | Gene          | Log <sub>2</sub> Fold Change | Adjusted <i>p</i> value |
|-------------|------------------------------|-------------------------|---------------|------------------------------|-------------------------|
| <i>ygdG</i> | 1.70                         | 0.03493436              | <i>sseB</i>   | -1.34                        | 0.036863778             |
| <i>yegH</i> | 1.69                         | 0.004739586             | <i>cbdB</i>   | -1.38                        | 0.010041104             |
| <i>ygiM</i> | 1.69                         | 0.017625157             | <i>ydfJ_1</i> | -1.39                        | 0.017199998             |
| <i>arnB</i> | 1.69                         | 0.016891107             | <i>aslA</i>   | -1.41                        | 0.038879805             |
| <i>hipA</i> | 1.67                         | 0.008351201             | <i>yidC</i>   | -1.42                        | 0.043508234             |
| <i>manX</i> | 1.67                         | 0.009421219             | <i>yobA</i>   | -1.43                        | 0.036863778             |
| <i>argD</i> | 1.67                         | 0.022296223             | <i>prfC</i>   | -1.44                        | 0.036443447             |
| <i>arnC</i> | 1.64                         | 0.006762404             | <i>speC</i>   | -1.45                        | 0.009865763             |
| <i>srmB</i> | 1.64                         | 0.009959883             | <i>lepB</i>   | -1.45                        | 0.00355906              |
| <i>nanM</i> | 1.62                         | 0.004574303             | <i>yffL</i>   | -1.47                        | 0.044274961             |
| <i>yedK</i> | 1.60                         | 0.031465369             | <i>rsmB</i>   | -1.48                        | 0.012827374             |
| <i>hns</i>  | 1.59                         | 0.035334862             | <i>trkA</i>   | -1.48                        | 0.046253495             |
| <i>acpH</i> | 1.57                         | 0.004574303             | <i>purR</i>   | -1.48                        | 0.044274961             |
| <i>rimO</i> | 1.52                         | 0.002426303             | <i>dmsD</i>   | -1.48                        | 0.024354171             |
| <i>pfkB</i> | 1.52                         | 0.034921441             | <i>yggX</i>   | -1.49                        | 0.002341076             |
| <i>norR</i> | 1.52                         | 0.036443447             | <i>nnr</i>    | -1.50                        | 0.033881071             |
| <i>cmoA</i> | 1.51                         | 0.044274961             | <i>yfeO</i>   | -1.51                        | 0.004378689             |
| <i>adk</i>  | 1.50                         | 0.034888857             | <i>yciA</i>   | -1.53                        | 0.011532221             |
| <i>yoeG</i> | 1.49                         | 0.022994207             | <i>folC</i>   | -1.54                        | 0.034888857             |
| <i>yhiN</i> | 1.47                         | 0.024354171             | <i>ykfA</i>   | -1.54                        | 0.024857104             |
| <i>yfdE</i> | 1.46                         | 0.019770045             | <i>dkgA</i>   | -1.56                        | 0.014809737             |
| <i>glnQ</i> | 1.44                         | 0.010041104             | <i>narV</i>   | -1.60                        | 0.006524094             |
| <i>dbpA</i> | 1.43                         | 0.007721396             | <i>ycgL</i>   | -1.60                        | 0.01166184              |
| <i>rnt</i>  | 1.43                         | 0.036443447             | <i>yohD</i>   | -1.62                        | 0.004361867             |
| <i>ykgF</i> | 1.41                         | 0.024354171             | <i>satP</i>   | -1.62                        | 0.011904371             |
| <i>idi</i>  | 1.38                         | 0.018102718             | <i>rcnB</i>   | -1.63                        | 0.004186425             |
| <i>hicB</i> | 1.37                         | 0.009421219             | <i>yhfA</i>   | -1.63                        | 0.001932853             |
| <i>cueO</i> | 1.36                         | 0.036443447             | <i>fabF</i>   | -1.65                        | 0.036443447             |
| <i>yebF</i> | 1.31                         | 0.036863778             | <i>ybcJ</i>   | -1.69                        | 0.036443447             |
| <i>yoaD</i> | 1.29                         | 0.046253495             | <i>yjcB</i>   | -1.70                        | 0.003158468             |
| <i>yfeY</i> | 1.23                         | 0.043508234             | <i>rbn</i>    | -1.71                        | 0.013126201             |
| <i>yafN</i> | 1.18                         | 0.034888857             | <i>yqjG</i>   | -1.81                        | 0.003538829             |
| <i>ygaP</i> | 1.18                         | 0.036443447             | <i>parC</i>   | -1.81                        | 0.017176033             |
| <i>yqjF</i> | 1.14                         | 0.029026226             | <i>cspD</i>   | -1.81                        | 0.002938926             |
| <i>prlF</i> | 1.10                         | 0.046383621             | <i>yafL</i>   | -1.82                        | 0.024480757             |
| <i>livF</i> | -1.14                        | 0.044274961             | <i>xanP</i>   | -1.84                        | 0.031465369             |
| <i>etk</i>  | -1.17                        | 0.033881071             | <i>leuB</i>   | -1.84                        | 0.000279367             |
| <i>narU</i> | -1.18                        | 0.044274961             | <i>xylA</i>   | -1.87                        | 0.036443447             |
| <i>slyX</i> | -1.18                        | 0.041855646             | <i>eutH</i>   | -1.88                        | 0.001642406             |
| <i>rlmJ</i> | -1.22                        | 0.049247204             | <i>tsaD</i>   | -1.90                        | 0.036443447             |
| <i>phnP</i> | -1.23                        | 0.04792992              | <i>kdgK</i>   | -1.93                        | 0.044274961             |
| <i>mraY</i> | -1.24                        | 0.036443447             | <i>leuA</i>   | -1.94                        | 0.000251888             |
| <i>ybdZ</i> | -1.31                        | 0.011498403             | <i>curA</i>   | -1.96                        | 3.62E-05                |
| <i>modA</i> | -1.34                        | 0.027517357             | <i>yecE</i>   | -2.01                        | 0.027517357             |

| <b>Gene</b> | <b>Log<sub>2</sub> Fold Change</b> | <b>Adjusted <i>p</i> value</b> |
|-------------|------------------------------------|--------------------------------|
| <i>leuD</i> | -2.05                              | 0.007422015                    |
| <i>ydcA</i> | -2.14                              | 0.003618422                    |
| <i>yaiC</i> | -2.16                              | 0.013126201                    |
| <i>ypfG</i> | -2.22                              | 0.013493579                    |
| <i>ldrB</i> | -2.23                              | 0.007046702                    |
| <i>rhtB</i> | -2.24                              | 4.40E-05                       |
| <i>prpD</i> | -2.27                              | 0.024679973                    |
| <i>cysZ</i> | -2.31                              | 0.014236228                    |
| <i>leuC</i> | -2.34                              | 2.78E-06                       |
| <i>menA</i> | -2.37                              | 1.51E-05                       |
| <i>coaA</i> | -2.38                              | 0.029683077                    |
| <i>yfaZ</i> | -2.41                              | 0.006939919                    |
| <i>ybjO</i> | -2.41                              | 0.004474186                    |
| <i>lgoD</i> | -2.43                              | 0.046253495                    |
| <i>pheA</i> | -2.56                              | 8.62E-06                       |
| <i>ycgM</i> | -2.70                              | 0.00308444                     |
| <i>yciG</i> | -2.71                              | 0.009421219                    |
| <i>allB</i> | -2.89                              | 0.005737942                    |
| <i>ldrA</i> | -2.94                              | 0.000207817                    |
| <i>add</i>  | -2.99                              | 0.000108515                    |
| <i>ygeG</i> | -3.38                              | 0.046383621                    |
| <i>ldrC</i> | -3.41                              | 2.92E-06                       |
| <i>yhdV</i> | -3.46                              | 1.44E-09                       |
| <i>pnuC</i> | -3.52                              | 2.55E-08                       |
| <i>nadA</i> | -3.81                              | 1.28E-10                       |
| <i>nadB</i> | -4.64                              | 1.54E-19                       |
| <i>ymdF</i> | -6.27                              | 5.10E-13                       |

1. Figueira, R., Brown, D. R., Ferreira, D., Eldridge, M. J. G., Burchell, L., Pan, Z., ... Wigneshweraraj, S. (2015). Adaptation to sustained nitrogen starvation by *Escherichia coli* requires the eukaryote-like serine/threonine kinase YeaG. *Scientific Reports*, 5(August), 1–14.
2. Lee, D. J., Bingle, L. E., Heurlier, K., Pallen, M. J., Penn, C. W., Busby, S. J., & Hobman, J. L. (2009). Gene doctoring: A method for recombineering in laboratory and pathogenic *Escherichia coli* strains. *BMC Microbiology*, 9, 1–14.
